# Supplementary material for: Homozygosity mapping reveals novel and known mutations in Pakistani families with inherited retinal dystrophies
Source: PubMed Central journal article supplement (PMC4421863; doi:10.1038/srep09965), 2015-05-06
Supplement: srep09965-s1.pdf [file srep09965-s1.pdf]

## SUPPLEMENTARY INFORMATION

### Homozygosity mapping reveals novel and known mutations in Pakistani families with inherited retinal dystrophies

Muhammad Arif Nadeem Saqib, Konstantinos Nikopoulos, Ehsan Ullah, Falak Sher Khan, Jamila Iqbal, Rabia Bibi, Afeefa Jarral, Sundus Sajid, Koji M. Nishiguchi, Giulia Venturini, Muhammad Ansar, Carlo Rivolta

**Supplementary Table S1.** Primers used in this study.

| Exon        | Primer                 | Product size (bp) |
|-------------|------------------------|-------------------|
| CNGB1Ex2F   | GCTGATCTCAAACCTCTGGA   |                   |
| CNGB1Ex2R   | GCCAACCTTTTCTGCTGTAG   | 478               |
| CNGB1Ex3F   | CTTGAGGGAGAATCAGGCTG   |                   |
| CNGB1Ex3R   | CCACCCTTAGCTTCTCTGAG   | 273               |
| CNGB1Ex4F   | CTCTCCCCTGACTTGATCTC   |                   |
| CNGB1Ex4R   | TCAAGGGGCTAACAGTCTAA   | 492               |
| CNGB1Ex5-6F | AGGGACAGAGACTCACCTAG   |                   |
| CNGB1Ex5-6R | CAGTCAGGTGAGAAGATCCA   | 430               |
| CNGB1Ex7F   | TGACCCTGCTTTGAACCTG    |                   |
| CNGB1Ex7R   | AAACAGGCCCAGAAGAGAC    | 300               |
| CNGB1Ex8F   | TGAGAGTTTCCAGGACAAGG   |                   |
| CNGB1Ex8R   | AGTCACTCCTCCCATAGAG    | 379               |
| CNGB1Ex9F   | CGGGATTCAGAAGGAGAGAC   |                   |
| CNGB1Ex9R   | TTACCCAAGACCCACAAGT    | 413               |
| CNGB1Ex10F  | GGTCTGTTTGAGGATTGGGA   |                   |
| CNGB1Ex10R  | GAAAATGTGGGAAAGGGCAC   | 492               |
| CNGB1Ex11F  | TTGTTTTCTGCCTTGGGAAC   |                   |
| CNGB1Ex11R  | AGGGAGTGGGTGGAATGAA    | 319               |
| CNGB1Ex12F  | AGGGACTCTCTTCTCCATCC   |                   |
| CNGB1Ex12R  | CTACCTGGCTACCTGAACAG   | 375               |
| CNGB1Ex13F  | ACTGCATGACTAAGCACTGA   |                   |
| CNGB1Ex13R  | GGGAGAAGGATGGCTGTATG   | 429               |
| CNGB1Ex14F  | CCTACAGAAAATAGAGGCAGGA |                   |
| CNGB1Ex14R  | CAGCCTTACACAGCACAGAA   | 292               |
| CNGB1Ex15F  | TTCTTGGGCATCTCTGTACC   |                   |
| CNGB1Ex15R  | CCCTGTAAGCAAAGTGGACA   | 295               |
| CNGB1Ex16F  | AAGGCAGATCTAACAGGAGC   |                   |
| CNGB1Ex16R  | AAGGAGATGGAGGGAGAGGA   | 354               |
| CNGB1Ex17F  | CCCTCAAACATGCTTTCTC    |                   |
| CNGB1Ex17R  | CCAACCTCGCTGTGTGATTTT  | 385               |
| CNGB1Ex18F  | TGGCTCTAGATGATCTTTAGGG |                   |
| CNGB1Ex18R  | CTCAGCCTCTCCTTACAAG    | 491               |
| CNGB1Ex19F  | TCCCGGACTGAATTTCTTC    |                   |
| CNGB1Ex19R  | GATCCCAAATCCAGAGAGTG   | 496               |
| CNGB1Ex20F  | TCTCTCTGCATCCTCTACCT   |                   |
| CNGB1Ex20R  | CAGGCAAGAAACTGTGGAAT   | 388               |
| CNGB1Ex21F  | AGTGCCACATGTAGTAGTTGA  |                   |
| CNGB1Ex21R  | TATTGAACAAGCACAGCAGC   | 465               |
| CNGB1Ex22F  | GATGGTCCTTGGGCTGTTAT   |                   |
| CNGB1Ex22R  | CTTGTGGTTTGGAGGACACT   | 323               |
| CNGB1Ex23F  | GAGGATAATGAAGCTGCCCT   |                   |
| CNGB1Ex23R  | ATAAATGCATCTCCCCTCGG   | 439               |
| CNGB1Ex24F  | GGGCTGAGGACTTCTGATAT   |                   |
| CNGB1Ex24R  | TGTTGAATGTTGTGTGTGCA   | 377               |
| CNGB1Ex25F  | GGTGCAATCTCAACAAAGCA   |                   |

|               |                          |     |
|---------------|--------------------------|-----|
| CNGB1Ex25R    | CCTTGTCATGCCAGTGATTG     | 393 |
| CNGB1Ex26F    | GGGTTTCTGTCTTTTGCACA     |     |
| CNGB1Ex26R    | GGTCTCTGCAGAAAACCATT     | 521 |
| CNGB1Ex27F    | CCCGTCAGTAAACTTTCTCTG    |     |
| CNGB1Ex27R    | TCAGAGACACAGAGGACGA      | 436 |
| CNGB1Ex28-29F | TGCACTACAAATCCAGAGTG     |     |
| CNGB1Ex28-29R | CAGCTCAGTTCCTTGAAAGC     | 483 |
| CNGB1Ex30F    | AGTCTACAGATGGGGTGACT     |     |
| CNGB1Ex30R    | CCCACACAGATGAGAACCTT     | 472 |
| CNGB1Ex31F    | ACCACTGTCCTCCACACAT      |     |
| CNGB1Ex31R    | ATGATCACTCCACTGCACTC     | 384 |
| CNGB1Ex32F    | AATCACCACCACTACACAGC     |     |
| CNGB1Ex32R    | CTTGCACTCTGTCACTGGTA     | 484 |
| CNGB1Ex33F    | CACCCACCACTAGATTTC       |     |
| CNGB1Ex33R    | AAGCATCTTCTCTTGAGCCG     | 549 |
| CNGB3Ex1F     | AGCTAAGGAGTTGCCTGTAGGA   |     |
| CNGB3Ex1R     | CAGATGGTGCCAGGTAATACTA   | 397 |
| CNGB3 Ex2F    | TGTGGAGGCTGAGGTTGATT     |     |
| CNGB3 Ex2R    | TCATCAGACAGCACATTTCA     | 357 |
| CNGB3Ex3F     | GCCTGAAGGTGTCTACCAGT     |     |
| CNGB3Ex3R     | AGCTAAAGGGGAGAGTGGAT     | 494 |
| CNGB3 Ex4F    | ATTCCACCAGCACTATTTCC     |     |
| CNGB3 Ex4R    | CCTCAGCACTTCTTTCTTCC     | 372 |
| CNGB3 Ex5F    | GCGGTGTTTGGTTAAGAAAT     |     |
| CNGB3 Ex5R    | CAGGGTTTCTTGGTGATAGC     | 294 |
| CNGB3Ex6F     | GTCCAGAGGCAGAATGGTGT     |     |
| CNGB3Ex6R     | TTCTTGCAATTATCCATGCAG    | 484 |
| CNGB3 Ex7F    | GAACCAACCAAGAGAAACAGTTA  |     |
| CNGB3 Ex7R    | AAAGTCAAATGGTAATAGATCACG | 200 |
| CNGB3 Ex8F    | TGCAACGCCTAAGGAGAGAT     |     |
| CNGB3 Ex8R    | AGCATTGATGAGGGCAGAAA     | 491 |
| CNGB3Ex9F     | AAAATGTACTGTCCAGAGGAAAA  |     |
| CNGB3Ex9R     | GGGTCATATCCCTGCCAAAT     | 316 |
| CNGB3 Ex10F   | TGGCACCATCACTTTGTA CTG   |     |
| CNGB3 Ex10R   | AGCATTTACCAGCCATTGAATG   | 399 |
| CNGB3Ex11F    | TTCTCCAAGAATAGTGGTCTTT   |     |
| CNGB3Ex11R    | CATCCTCCTTCAACTCATTAAAA  | 362 |
| CNGB3Ex12F    | TGAAAAGTTGTCTGGGCAAG     |     |
| CNGB3Ex12R    | TTCAACCTTTTGTTCAAATCCA   | 426 |
| CNGB3Ex13F    | TGTTTGCATTTTGTTCCTTT     |     |
| CNGB3Ex13R    | GGTTCTAAAGAATAAGCCGTTGG  | 398 |
| CNGB3 Ex14F   | CCATAGCCATTGGCAGTTA      |     |
| CNGB3 Ex14R   | ATGTCCGAAATCCTCAAATG     | 280 |
| CNGB3 Ex15F   | TGTTCAACCCATGTCTGTAAA    |     |
| CNGB3 Ex15R   | AAATCTGAGCGGGA ACTTATT   | 382 |
| CNGB3 Ex16F   | GCCATTTCTATTCCCACATC     |     |
| CNGB3 Ex16R   | AAACCAACTCCATCCATCTC     | 362 |
| CNGB3 Ex17F   | ACTTGATCACAGTGAGATATGCT  |     |

|               |                         |     |
|---------------|-------------------------|-----|
| CNGB3 Ex17R   | GTCCAAATCATCCCAGTGTCTG  | 434 |
| CNGB3Ex18F    | GCCATTGCATGCTAATCAAA    |     |
| CNGB3Ex18R    | TGCATGAAATCACACTCTCAGAT | 573 |
| PDE6AEx1F     | CTTAATCTCCCAAGCTTGCTC   |     |
| PDE6AEx1R     | TTGTCACCAGCCTTGTCTTG    | 742 |
| PDE6AEx2F     | GCCCCTGTTGAAGAGGAATA    |     |
| PDE6AEx2R     | GAAAAGTGAAGGAGGTTCAA    | 370 |
| PDE6AEx3F     | TTGTCTCTGATGAAGCTTTGAA  |     |
| PDE6AEx3R     | TAGGCACCTTCATTCCCATC    | 297 |
| PDE6AEx4F     | TGGATTATTGTGAAGGGTAAATG |     |
| PDE6AEx4R     | GCCAAGACTCTAGCCGTCAG    | 340 |
| PDE6AEx5F     | TGTTAGCTGACTCATGGAGGTG  |     |
| PDE6AEx5R     | TCCTTTAACAGGGTTTACTGTGC | 237 |
| PDE6AEx6F     | AGATCAAGCCATTGCACTCC    |     |
| PDE6AEx6R     | TGCTTGTCTTTCTTCAGTCCTTC | 325 |
| PDE6AEx7F     | CCAACATTTTGGGTTTGGTC    |     |
| PDE6AEx7R     | TCCTTCCACTCTTTCTTCCA    | 276 |
| PDE6AEx8F     | GACAAGAACATGGTGTCTCTGA  |     |
| PDE6AEx8R     | CCCCATTTCCATTGGTACAG    | 300 |
| PDE6AEx9F     | TCTCAGCCAATCAGGGTCAT    |     |
| PDE6AEx9R     | GCAGTGAGAGTGAAGAAAGTGG  | 396 |
| PDE6AEx10F    | TCAAACCCATTTTATAGCTGAGA |     |
| PDE6AEx10R    | GCTAGGCAGGAAGGAACACA    | 400 |
| PDE6AEx11-12F | GAGCTGGTGGTTCTGTTGC     |     |
| PDE6AEx11-12R | GCAAGCAAGAAAGAAAATTAATA | 587 |
| PDE6AEx17F    | GCCTTGGCTCTTTCAACCTT    |     |
| PDE6AEx17R    | TGAAGGCCTCCAAAATGAAA    | 362 |
| PDE6AEx13F    | TCACCTCCTGGTCCAATGAT    |     |
| PDE6AEx13R    | AGCCCGTACTGCTTTCACAT    | 397 |
| PDE6AEx14F    | TTTTAGTTCTGGGCCCTCCT    |     |
| PDE6AEx14R    | AGACTTCCCTGTTGGCCAGT    | 300 |
| PDE6AEx15-16F | TCACTTGTGGAGAAGGCTGA    |     |
| PDE6AEx15-16R | CCTGGGCAACAGAGTGAGAT    | 383 |
| PDE6AEx18-19F | GATGCAATGGGGGTGAGC      |     |
| PDE6AEx18-19R | CTGCATTAGGAAAAGTTCATCT  | 700 |
| PDE6AEx20F    | AAGGAGCATACTGCCTCTGG    |     |
| PDE6AEx20R    | GTTGTCTGGAAATCCCAGGT    | 487 |
| PDE6AEx21F    | GCTACTCCGAAGCAGCTCAT    |     |
| PDE6AEx21R    | GCCTGAATGAGACTCCGTGT    | 361 |
| PDE6AEx22F    | TTTGCCTTCTGCATGTGTTG    |     |
| PDE6AEx22R    | CAGGGAAGCCAAAAGATTGA    | 376 |
| RHOEx1F       | TGCAGCGGGGATTAATATGA    |     |
| RHOEx1R       | ATTGACAGGACAGGAGAAGG    | 684 |
| RHOEx2F       | CCTGGAATTTCTTTGCCAG     |     |
| RHOEx2R       | GATTCTGTTTGACATGGGGC    | 599 |
| RHOEx3F       | GAATGTGAAGCCCCAGAAAG    |     |
| RHOEx3R       | CTGGTGGGTGAAGATGTAGA    | 518 |
| RHOEx4F       | TATGGGCAGCTCGTCTTCA     |     |

|               |                         |      |
|---------------|-------------------------|------|
| RHOEx4R       | CTGCATTTCTCACACTCC      | 542  |
| RHOEx5F       | CAGTTCCAAGCACACTGT      |      |
| RHOEx5R       | AAGGAGCCTATGTGACTTCCG   | 290  |
| KCNV2Ex1-1F   | CGAGGTTGACCGACATTTTT    |      |
| KCNV2Ex1-1R   | GCACCCAGGGAGCAAATG      | 506  |
| KCNV2Ex1_2-F  | TCCTCCTAGAGGCAGTGAGC    |      |
| KCNV2Ex1_2-R  | GTAGACCAGCTGGAAGACGG    | 565  |
| KCNV2Ex1_3-F  | CTAAGCCTGTGCGACGACTA    |      |
| KCNV2Ex1_3-R  | GCAGGTA CTGAGCGTGAAG    | 550  |
| KCNV2Ex1_4-F  | TTCTTCACGCTCGAGTACCTG   |      |
| KCNV2Ex1_4-R  | TTTTGTTAGCTGTATGCGGCG   | 567  |
| KCNVEx1-3-4 R | CTTGAGGATGCGGAAGATG     |      |
| KCNV2Ex2_1-F  | TTCTTCTCCTCCCCGATCTT    |      |
| KCNV2Ex2_1-R  | TCTAAGCTGTTGCTCCCCTC    | 597  |
| KCNV2Ex2_2-F  | TGGCCCAA ACTCAGAATGTC   |      |
| KCNV2Ex2_2-R  | CTCCCTCCCTCTGAAAAGTT    | 223  |
| CNGA3Ex1F     | TGTGTGTGTCCCCACCTTTA    |      |
| CNGA3Ex1R     | CCAGCTCAAGAGCCCCTAA     | 453  |
| CNGA3Ex2F     | GATGAGCTGGGTTTGCAGTT    |      |
| CNGA3Ex2R     | GACCAGAGCCAGGCATAAAA    | 250  |
| CNGA3Ex3F     | GGGCTTGAAATCAATTCTGC    |      |
| CNGA3Ex3R     | CCCCATCTAGCACTTTTTCC    | 238  |
| CNGA3Ex4F     | TTCCTCTCCCTCTGGCTCA     |      |
| CNGA3Ex4R     | AACAGGATGGAGCAAAGCAC    | 298  |
| CNGA3Ex5F     | CCCAAGGAATGGAAACAGAG    |      |
| CNGA3Ex5R     | TAAGGAGAGAGGCCAAGCTG    | 193  |
| CNGA3Ex6F     | CAAAGCTACAGTCTTGGAGCA   |      |
| CNGA3Ex6R     | CCTGGTTTCCCCCTTTCC      | 216  |
| CNGA3Ex7F     | CTCCAGAAACACACGCACAG    |      |
| CNGA3Ex7R     | TAATGTCCCATCCACCATGC    | 238  |
| CNGA3Ex8aF    | AAAAGTCAGCCTCTGTGATGC   |      |
| CNGA3Ex8aR    | AGGCTCTTGAGCACCTCCTT    | 753  |
| CNGA3Ex8bF    | CCAACAAGAAGACGGTGGAT    |      |
| CNGA3Ex8bR1   | TGCTGCATTTTCACTGTTGTT   | 759  |
| CNGA3Ex8bR2   | AAAAAGCCTAAAAACACCTTGC  | 1090 |
| RPGRIP1Ex1F   | TGTCCACACTACCATGAGAATGA |      |
| RPGRIP1Ex1R   | CTGGGTGACAGAGCGAGACT    | 345  |
| RPGRIP1Ex2F   | TGCTCTCTGGACAAGATGTGA   |      |
| RPGRIP1Ex2R   | GGCAGGAGAATTGCTTGAAT    | 372  |
| RPGRIP1Ex3F   | TGTA CTGGGGACAGAAGGCTA  |      |
| RPGRIP1Ex3R   | AAACGTGGCTGGCACATC      | 498  |
| RPGRIP1Ex4F   | AAGGGTTT CACCCAGGTCTC   |      |
| RPGRIP1Ex4R   | AAAATTAGCTGGGCATGGTG    | 669  |
| RPGRIP1Ex5F   | TCCTCGACATGTACCAAGGTT   |      |
| RPGRIP1Ex5R   | CCTCTGAGATGGAGGAAAGG    | 410  |
| RPGRIP1Ex6F   | GTAAGACGGGAAGGCAAGAG    |      |
| RPGRIP1Ex6R   | TTGTGAGGCTTGGATTTGAA    | 386  |
| RPGRIP1Ex7F   | TGATTTGTTTTGTGGGATTTTT  |      |

|              |                          |     |
|--------------|--------------------------|-----|
| RPGRIP1Ex7R  | AATTTGCTCCAGCAATAGGC     | 409 |
| RPGRIP1Ex8F  | TCCAGAGAAATGCTAGGGTGA    |     |
| RPGRIP1Ex8R  | ACTGCTAGGGAAGCAGCAAA     | 554 |
| RPGRIP1Ex9F  | AGTTGGATGGCTTCTCAGAC     |     |
| RPGRIP1Ex9R  | AGTGTCAAATCCCTTCCAAAAG   | 370 |
| RPGRIP1Ex10F | TGGGAAATGGATATGACTTGG    |     |
| RPGRIP1Ex10R | CCCAAACCAGAGGTAGAGGA     | 472 |
| RPGRIP1Ex11F | CACTTGATCCAACCTGACCA     |     |
| RPGRIP1Ex11R | CAGCGAGACTCTGTCTCAAAA    | 382 |
| RPGRIP1Ex12F | ACCAACAACCTGTTTTATGGAGAA |     |
| RPGRIP1Ex12R | GGCATGTGTGAGTCCTCAAG     | 398 |
| RPGRIP1Ex13F | GGGTCTGCAAGGAAATCAAA     |     |
| RPGRIP1Ex13R | ATGAGAGGCACCCTTCTTGA     | 396 |
| RPGRIP1Ex14F | TGGACTTCCACCATGTGTTT     |     |
| RPGRIP1Ex14R | TACAGATGGTGTGGCAAGGA     | 685 |
| RPGRIP1Ex15F | TGTTCTTGATCCTTGCCACA     |     |
| RPGRIP1Ex15R | CTCATGAGCTGTTTGGCTGA     | 271 |
| RPGRIP1Ex16F | GTTTGCAGGCAGGTGAAGAT     |     |
| RPGRIP1Ex16R | TCTGCTCTGTTGCTCTTGACA    | 649 |
| RPGRIP1Ex17F | TGCACTGCTGTTTGATTTACTT   |     |
| RPGRIP1Ex17R | TGAGCCACTGCACCTACTTC     | 464 |
| RPGRIP1Ex18F | TCAGCTCCATGAGGAGAGAAA    |     |
| RPGRIP1Ex18R | CCCAAAGTGCTGGGATTACA     | 472 |
| RPGRIP1Ex19F | GCCTGAGTGACAGAGGGAGA     |     |
| RPGRIP1Ex19R | GCTGCTCTTGAAAGCCTGAT     | 385 |
| RPGRIP1Ex20F | GATGTGTGTGCTGGGTCTTTT    |     |
| RPGRIP1Ex20R | CATGACTGGCCACTGTCATTA    | 242 |
| RPGRIP1Ex21F | TGCCAGTTTTACCTATAAAAGGA  |     |
| RPGRIP1Ex21R | TGTTTCATCAGACTTCCTCACC   | 400 |
| RPGRIP1Ex22F | AGACTGCGGTGAACCAAGAT     |     |
| RPGRIP1Ex22R | GCATCAGCACAAAACCAAAC     | 400 |
| RPGRIP1Ex23F | AAGTGATTCAGAGAAGACGTTGT  |     |
| RPGRIP1Ex23R | TGTAGGGATAAGATTTCAATCCA  | 373 |
| RPGRIP1Ex24F | CCCAGTACCTAACCTGACAAAT   |     |
| RPGRIP1Ex24R | GCCTGGTAAAGTGCTAAGGTACT  | 400 |

**Supplementary Table S2.** Individuals genotyped for homozygosity mapping

| <b>Family ID</b> | <b>Genotyped individuals</b>                      |
|------------------|---------------------------------------------------|
| MA97             | III-1, III-2, IV-1, IV-2, IV-5, IV-6              |
| MA62             | IV-1, IV-3, V-3, V-4, V-5, V-6, V-7, V-8          |
| MA132            | III-1, III-2, IV-3, IV-4, IV-5, IV-1              |
| MA25             | IV-1, IV-2, V-1, V-3, V-4, VI-1, VI-2, VI-4, VI-5 |
| MA69             | III-3, III-4, IV-10, IV-11, IV-12, IV13, IV-14    |
| MA94             | IV-1, IV-2, V-3, V-4, V-5                         |
| MA117            | III-2, IV-1, IV-2, IV-3, IV-4                     |
| MA123            | III-1, IV-2, IV-3, IV-4                           |

**Supplementary Table S3.** Homozygous regions identified

| Family ID | Homozygous Region |                                      |             | Known IRD gene (if any) |
|-----------|-------------------|--------------------------------------|-------------|-------------------------|
|           | Chr               | Flanking SNPs or genomic coordinates | Region (Mb) |                         |
| MA69      | 2                 | rs17041053-rs17652317                | 18.7        | <i>CNGA3</i>            |
|           | 6                 | rs6596790-rs1887507                  | 6.7         | -                       |
|           | 8                 | rs7006666-rs2705017                  | 3.9         | -                       |
| MA94      | 7                 | rs727531-rs764891                    | 36.6        | <i>IMPDH1</i>           |
|           | 8                 | rs4629903-rs28624756                 | 50.5        | <i>CNGB3</i>            |
| MA25      | 2                 | g.85,488,120-105,479,784/hg19        | 19.9        | <i>CNGA3</i>            |
| MA97      | 8                 | rs11984569-rs12542396                | 29.40       | -                       |
|           | 9                 | rs12344716-rs12236186                | 3.31        | -                       |
|           | 16                | rs12596791-rs11866632                | 47.25       | <i>CNGB1</i>            |
| MA132     | 5                 | rs3995091-rs7724036                  | 2.43        | <i>PDE6A</i>            |
| MA62      |                   | rs11923216-rs17301766                | 6.43        | <i>RHO</i>              |
| MA117     | 4                 | rs6534397-rs11947641                 | 2.41        | -                       |
|           | 8                 | rs4873772-rs11947641                 | 2.40        | -                       |
|           | 10                | rs7093966-rs11592507                 | 3.14        | -                       |
|           | 14                | rs7148898-rs12892350                 | 4.96        | <i>RPGRIP1</i>          |
| MA123     | 2                 | rs13384785-rs6708727                 | 11.64       | -                       |
|           | 9                 | rs7860758rs10756524                  | 11.85       | <i>KCNV2</i>            |
